# Supplementary material
Source: PubMed Central journal article supplement (PMC10561883)
Supplement: gbad082_suppl_supplementary_appendix.pdf [file gbad082_suppl_supplementary_appendix.pdf]

Supplemental Figure A. Latent transition analysis model of cognition with covariates moderating transition probabilities

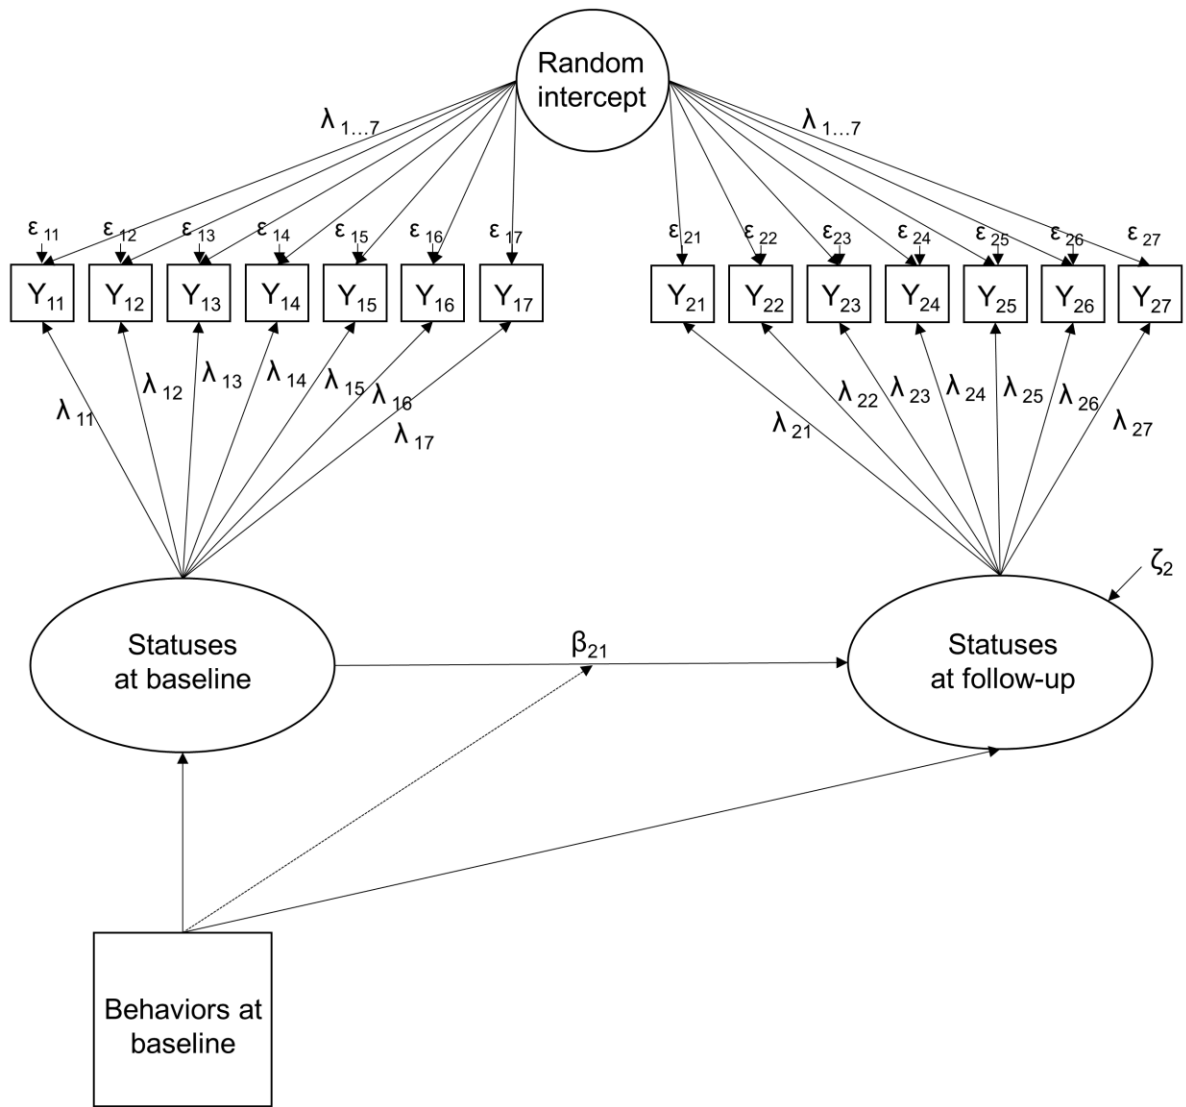

Supplemental Table A. Fit indices for latent class analyses of cognition data for the 2012 and 2018 waves of the Mexican Health and Aging Study.

| <b>Number of classes</b> | <b>BIC</b> | <b>LMR (p-value)</b> | <b>Adjusted LMR (p-value)</b> | <b>Entropy</b> | <b>Range of class size proportions</b> |
|--------------------------|------------|----------------------|-------------------------------|----------------|----------------------------------------|
| <i>2012 wave</i>         |            |                      |                               |                |                                        |
| 2                        | 57706.471  | 0.0000               | 0.0000                        | 0.578          | 0.28-0.72                              |
| 3                        | 57407.542  | 0.0000               | 0.0000                        | 0.633          | 0.12-0.69                              |
| 4                        | 57270.679  | 0.0000               | 0.0000                        | 0.545          | 0.06-0.50                              |
| 5                        | 57298.067  | 0.0136               | 0.0144                        | 0.611          | 0.04-0.55                              |
| 6                        | 57345.023  | 0.2868               | 0.2920                        | 0.618          | 0.01-0.52                              |
| <i>2018 wave</i>         |            |                      |                               |                |                                        |
| 2                        | 38526.025  | 0.0000               | 0.0000                        | 0.613          | 0.29-0.71                              |
| 3                        | 38401.026  | 0.0000               | 0.0000                        | 0.574          | 0.18-0.62                              |
| 4                        | 38384.082  | 0.0001               | 0.0001                        | 0.541          | 0.07-0.54                              |
| 5                        | 38416.086  | 0.0003               | 0.0003                        | 0.609          | 0.03-0.55                              |
| 6                        | 38466.723  | 0.6882               | 0.6927                        | 0.592          | 0.05-0.57                              |

Supplemental Table B. Estimates for probabilities/thresholds of impairment at baseline of latent statuses identified in random intercept-latent transition analysis among participants from the Mexican Health and Aging Study included in these analyses (n=9,091).

| Characteristic                                                  | Normal cognition<br>(n = 5,376) | Temporal disorientation<br>(n = 1,378) | Perceptual-motor function impairment<br>(n = 736) | Learning and memory impairment<br>(n = 1,601) |
|-----------------------------------------------------------------|---------------------------------|----------------------------------------|---------------------------------------------------|-----------------------------------------------|
| <b><i>Probability of impairment (<math>\tau</math>; SE)</i></b> |                                 |                                        |                                                   |                                               |
| Date orientation                                                | 0.00<br>(8.766;<br>2.421)       | 0.32 (0.772;<br>0.149)                 | 0.19 (1.423;<br>0.251)                            | 0.22 (1.250;<br>0.157)                        |
| Verbal learning                                                 | 0.12<br>(2.004;<br>0.133)       | 0.08 (2.454;<br>0.239)                 | 0.16 (1.642;<br>0.233)                            | 0.77 (-<br>1.184;<br>0.216)                   |
| Verbal memory                                                   | 0.08<br>(2.392;<br>0.127)       | 0.10 (2.208;<br>0.134)                 | 0.16 (1.635;<br>0.168)                            | 0.50 (0.004;<br>0.115)                        |
| Verbal fluency                                                  | 0.08<br>(2.484;<br>0.074)       | 0.06 (2.841;<br>0.152)                 | 0.09 (2.358;<br>0.224)                            | 0.27 (1.018;<br>0.100)                        |

|                              |                           |                        |                             |                        |
|------------------------------|---------------------------|------------------------|-----------------------------|------------------------|
| Visual scanning              | 0.12<br>(1.971;<br>0.079) | 0.07 (2.615;<br>0.140) | 0.19 (1.477;<br>0.192)      | 0.21 (1.330;<br>0.125) |
| Constructional praxis        | 0.05<br>(2.879;<br>0.161) | 0.05 (2.988;<br>0.380) | 1.00 (-6.10;<br>1.226)      | 0.13 (1.890;<br>0.153) |
| Constructional praxis memory | 0.10<br>(2.172;<br>0.071) | 0.10 (2.152;<br>0.109) | 0.61 (-<br>0.433;<br>0.245) | 0.23 (1.226;<br>0.104) |

Supplemental Table C. Association between engaging in various social and leisure time activities with baseline cognitive statuses relative to normal cognition status among participants from the Mexican Health and Aging Study included in these analyses (n=9,091).

| Behavior              | Learning and memory impairment                      |                |         | Perceptual-motor function impairment                |                |         | Temporal disorientation                             |                |         |
|-----------------------|-----------------------------------------------------|----------------|---------|-----------------------------------------------------|----------------|---------|-----------------------------------------------------|----------------|---------|
|                       | Estimate <sup>a</sup><br>(Odds ratio <sup>b</sup> ) | Standard error | P       | Estimate <sup>a</sup><br>(Odds ratio <sup>b</sup> ) | Standard error | P       | Estimate <sup>a</sup><br>(Odds ratio <sup>b</sup> ) | Standard error | P       |
| Volunteering          | -0.704<br>(0.49)                                    | 0.241          | 0.004*  | -0.042                                              | 0.226          | 0.853   | 0.212                                               | 0.180          | 0.238   |
| Attending a class     | -0.799<br>(0.45)                                    | 0.168          | <0.001* | -0.346                                              | 0.186          | 0.062   | -0.016                                              | 0.139          | 0.911   |
| Sports or social club | -0.678<br>(0.51)                                    | 0.235          | 0.004*  | -0.721<br>(0.49)                                    | 0.351          | 0.040*  | -0.220                                              | 0.195          | 0.260   |
| Reading               | -1.140<br>(0.32)                                    | 0.126          | <0.001* | -1.612<br>(0.20)                                    | 0.173          | <0.001* | -0.852<br>(0.43)                                    | 0.126          | <0.001* |
| Puzzles               | -1.352<br>(0.26)                                    | 0.218          | <0.001* | -0.996<br>(0.37)                                    | 0.221          | <0.001* | -0.142                                              | 0.157          | 0.364   |
| Playing games         | -0.953<br>(0.39)                                    | 0.240          | <0.001* | -0.855<br>(0.43)                                    | 0.260          | 0.001*  | 0.303                                               | 0.181          | 0.094   |

|                                                            |                  |       |             |                  |       |             |                  |       |             |
|------------------------------------------------------------|------------------|-------|-------------|------------------|-------|-------------|------------------|-------|-------------|
| Phones<br>and<br>internet                                  | -1.111<br>(0.33) | 0.111 | <0.001<br>* | -0.902<br>(0.41) | 0.139 | <0.001<br>* | -0.292<br>(0.75) | 0.127 | 0.021       |
| Gardening<br>/maintena<br>nce                              | -0.714<br>(0.49) | 0.114 | <0.001<br>* | -0.415<br>(0.66) | 0.122 | 0.001*      | -0.064           | 0.100 | 0.522       |
| Watching<br>television                                     | -1.243<br>(0.29) | 0.171 | <0.001<br>* | -1.362<br>(0.26) | 0.187 | <0.001<br>* | -0.776<br>(0.51) | 0.200 | <0.001<br>* |
| Sewing or<br>other<br>crafts                               | -1.201<br>(0.30) | 0.151 | <0.001<br>* | -0.511<br>(0.60) | 0.149 | 0.001*      | 0.039            | 0.111 | 0.725       |
| Engaging<br>in at least<br>4 of the<br>above<br>activities | -1.509<br>(0.22) | 0.141 | <0.001<br>* | -1.382<br>(0.25) | 0.165 | <0.001<br>* | -0.306<br>(0.74) | 0.129 | 0.018       |

<sup>a</sup>Log odds, relative to the normal cognition status

<sup>b</sup>Odds ratios presented for statistically significant results

Supplemental Table D. Moderating effects of reporting engagement in social and leisure time activities at baseline on subsequent transitions in cognitive statuses among participants from the Mexican Health and Aging Study included in these analyses (log odds; n=9,091)<sup>1</sup>.

**Volunteering**

| <i>From:</i> | LM-I  | <i>Est.</i> | <i>SE</i> | <i>P</i> | <i>From:</i> | PMF-I | <i>Est.</i> | <i>SE</i> | <i>P</i> | <i>From:</i> | TD    | <i>Est.</i> | <i>SE</i> | <i>P</i> | <i>From:</i> | NC    | <i>Est.</i> | <i>SE</i> | <i>P</i> |
|--------------|-------|-------------|-----------|----------|--------------|-------|-------------|-----------|----------|--------------|-------|-------------|-----------|----------|--------------|-------|-------------|-----------|----------|
| <i>To:</i>   | D     | -1.01       | 0.62      | 0.10     | <i>To:</i>   | D     | -0.90       | 0.91      | 0.41     | <i>To:</i>   | D     | -0.50       | 0.47      | 0.29     | <i>To:</i>   | D     | -0.08       | 0.32      | 0.81     |
|              | LM-I  | Ref         | Ref       | Ref      |              | LM-I  | 0.86        | 0.89      | 0.33     |              | LM-I  | -0.15       | 0.58      | 0.80     |              | LM-I  | -0.60       | 0.49      | 0.22     |
|              | PMF-I | -0.80       | 1.09      | 0.46     |              | PMF-I | Ref         | Ref       | Ref      |              | PMF-I | NA          | NA        | NA       |              | PMF-I | -1.05       | 0.25      | 0.40     |
|              | TD    | NA          | NA        | NA       |              | TD    | NA          | NA        | NA       |              | TD    | Ref         | Ref       | Ref      |              | TD    | NA          | NA        | NA       |
|              | NC    | 0.64        | 0.95      | 0.50     |              | NC    | 1.24        | 0.76      | 0.11     |              | NC    | 0.65        | 0.42      | 0.13     |              | NC    | Ref         | Ref       | Ref      |

**Attending a class**

| <i>From:</i> | LM-I  | <i>Est.</i> | <i>SE</i> | <i>P</i> | <i>From:</i> | PMF-I | <i>Est.</i> | <i>SE</i> | <i>P</i> | <i>From:</i> | TD    | <i>Est.</i> | <i>SE</i> | <i>P</i> | <i>From:</i> | NC    | <i>Est.</i> | <i>SE</i> | <i>P</i> |
|--------------|-------|-------------|-----------|----------|--------------|-------|-------------|-----------|----------|--------------|-------|-------------|-----------|----------|--------------|-------|-------------|-----------|----------|
| <i>To:</i>   | D     | -0.22       | 0.31      | 0.48     | <i>To:</i>   | D     | -0.25       | 0.54      | 0.64     | <i>To:</i>   | D     | -1.72       | 0.78      | 0.03     | <i>To:</i>   | D     | -0.02       | 0.23      | 0.95     |
|              | LM-I  | Ref         | Ref       | Ref      |              | LM-I  | -0.08       | 1.01      | 0.85     |              | LM-I  | 0.27        | 0.44      | 0.54     |              | LM-I  | -0.56       | 0.36      | 0.12     |
|              | PMF-I | -0.30       | 1.54      | 0.85     |              | PMF-I | Ref         | Ref       | Ref      |              | PMF-I | -0.85       | 2.08      | 0.68     |              | PMF-I | 0.20        | 0.45      | 0.65     |
|              | TD    | NA          | NA        | NA       |              | TD    | 0.20        | 1.05      | 0.85     |              | TD    | Ref         | Ref       | Ref      |              | TD    | NA          | NA        | NA       |
|              | NC    | 0.85        | 0.73      | 0.25     |              | NC    | 0.25        | 0.69      | 0.71     |              | NC    | 0.66        | 0.38      | 0.08     |              | NC    | Ref         | Ref       | Ref      |

**Sports or social club**

| <i>From:</i> | LM-I  | <i>Est.</i> | <i>SE</i> | <i>P</i> | <i>From:</i> | PMF-I | <i>Est.</i> | <i>SE</i> | <i>P</i> | <i>From:</i> | TD    | <i>Est.</i> | <i>SE</i> | <i>P</i> | <i>From:</i> | NC    | <i>Est.</i> | <i>SE</i> | <i>P</i> |
|--------------|-------|-------------|-----------|----------|--------------|-------|-------------|-----------|----------|--------------|-------|-------------|-----------|----------|--------------|-------|-------------|-----------|----------|
| <i>To:</i>   | D     | 0.09        | 0.46      | 0.84     | <i>To:</i>   | D     | -0.07       | 1.03      | 0.95     | <i>To:</i>   | D     | -0.33       | 0.63      | 0.61     | <i>To:</i>   | D     | -0.51       | 0.44      | 0.25     |
|              | LM-I  | Ref         | Ref       | Ref      |              | LM-I  | -0.18       | 1.72      | 0.92     |              | LM-I  | -0.75       | 0.90      | 0.41     |              | LM-I  | 0.09        | 0.31      | 0.78     |
|              | PMF-I | 0.28        | 2.05      | 0.89     |              | PMF-I | Ref         | Ref       | Ref      |              | PMF-I | 1.05        | 1.06      | 0.32     |              | PMF-I | NA          | NA        | NA       |
|              | TD    | NA          | NA        | NA       |              | TD    | NA          | NA        | NA       |              | TD    | Ref         | Ref       | Ref      |              | TD    | NA          | NA        | NA       |
|              | NC    | 0.90        | 1.02      | 0.38     |              | NC    | 0.759       | 1.05      | 0.48     |              | NC    | 0.67        | 0.54      | 0.21     |              | NC    | Ref         | Ref       | Ref      |

**Reading**

| <i>From:</i> | LM-I  | <i>Est.</i> | <i>SE</i> | <i>P</i> | <i>From:</i> | PMF-I | <i>Est.</i> | <i>SE</i> | <i>P</i> | <i>From:</i> | TD    | <i>Est.</i> | <i>SE</i> | <i>P</i> | <i>From:</i> | NC    | <i>Est.</i> | <i>SE</i> | <i>P</i> |
|--------------|-------|-------------|-----------|----------|--------------|-------|-------------|-----------|----------|--------------|-------|-------------|-----------|----------|--------------|-------|-------------|-----------|----------|
| <i>To:</i>   | D     | -0.15       | 0.19      | 0.45     | <i>To:</i>   | D     | -0.02       | 0.38      | 0.96     | <i>To:</i>   | D     | -0.05       | 0.29      | 0.86     | <i>To:</i>   | D     | -0.11       | 0.23      | 0.63     |
|              | LM-I  | Ref         | Ref       | Ref      |              | LM-I  | -0.51       | 0.75      | 0.50     |              | LM-I  | 0.11        | 0.39      | 0.78     |              | LM-I  | -0.48       | 0.21      | 0.02     |
|              | PMF-I | -0.35       | 0.68      | 0.60     |              | PMF-I | Ref         | Ref       | Ref      |              | PMF-I | 0.83        | 0.81      | 0.31     |              | PMF-I | -0.38       | 0.31      | 0.22     |

|  |    |      |      |      |  |    |       |      |      |  |    |      |      |      |  |    |     |     |     |
|--|----|------|------|------|--|----|-------|------|------|--|----|------|------|------|--|----|-----|-----|-----|
|  | TD | 2.45 | 0.74 | 0.00 |  | TD | -0.14 | 0.38 | 0.72 |  | TD | Ref  | Ref  | Ref  |  | TD | NA  | NA  | NA  |
|  | NC | 0.63 | 0.74 | 0.40 |  | NC | 1.14  | 0.38 | 0.00 |  | NC | 2.11 | 0.43 | 0.00 |  | NC | Ref | Ref | Ref |

**Puzzles**

|              |       |             |           |          |              |       |             |           |          |              |       |             |           |          |              |       |             |           |          |
|--------------|-------|-------------|-----------|----------|--------------|-------|-------------|-----------|----------|--------------|-------|-------------|-----------|----------|--------------|-------|-------------|-----------|----------|
| <b>From:</b> | LM-I  |             |           |          | <b>From:</b> | PMF-I |             |           |          | <b>From:</b> | TD    |             |           |          | <b>From:</b> | NC    |             |           |          |
|              |       | <i>Est.</i> | <i>SE</i> | <i>P</i> |
| <b>To:</b>   | D     | 0.10        | 0.40      | 0.80     | <b>To:</b>   | D     | -0.68       | 0.89      | 0.44     | <b>To:</b>   | D     | 0.05        | 0.49      | 0.91     | <b>To:</b>   | D     | -0.40       | 0.24      | 0.09     |
|              | LM-I  | Ref         | Ref       | Ref      |              | LM-I  | 1.13        | 0.72      | 0.12     |              | LM-I  | 0.22        | 0.62      | 0.72     |              | LM-I  | -0.38       | 0.26      | 0.15     |
|              | PMF-I | NA          | NA        | NA       |              | PMF-I | Ref         | Ref       | Ref      |              | PMF-I | 1.74        | 0.88      | 0.05     |              | PMF-I | -1.05       | 0.77      | 0.17     |
|              | TD    | NA          | NA        | NA       |              | TD    | NA          | NA        | NA       |              | TD    | Ref         | Ref       | Ref      |              | TD    | NA          | NA        | NA       |
|              | NC    | 0.75        | 1.10      | 0.49     |              | NC    | 0.73        | 0.67      | 0.27     |              | NC    | 1.63        | 0.45      | 0.00     |              | NC    | Ref         | Ref       | Ref      |

**Playing games**

|              |       |             |           |          |              |       |             |           |          |              |       |             |           |          |              |       |             |           |          |
|--------------|-------|-------------|-----------|----------|--------------|-------|-------------|-----------|----------|--------------|-------|-------------|-----------|----------|--------------|-------|-------------|-----------|----------|
| <b>From:</b> | LM-I  |             |           |          | <b>From:</b> | PMF-I |             |           |          | <b>From:</b> | TD    |             |           |          | <b>From:</b> | NC    |             |           |          |
|              |       | <i>Est.</i> | <i>SE</i> | <i>P</i> |
| <b>To:</b>   | D     | 0.02        | 0.34      | 0.96     | <b>To:</b>   | D     | -0.24       | 0.89      | 0.79     | <b>To:</b>   | D     | -0.10       | 0.34      | 0.78     | <b>To:</b>   | D     | -0.56       | 0.41      | 0.17     |
|              | LM-I  | Ref         | Ref       | Ref      |              | LM-I  | -0.45       | 1.78      | 0.80     |              | LM-I  | -0.33       | 0.48      | 0.48     |              | LM-I  | -0.29       | 0.34      | 0.41     |
|              | PMF-I | NA          | NA        | NA       |              | PMF-I | Ref         | Ref       | Ref      |              | PMF-I | 0.31        | 1.00      | 0.76     |              | PMF-I | -1.44       | 1.92      | 0.45     |
|              | TD    | -0.58       | 9.60      | 0.95     |              | TD    | -0.41       | 2.04      | 0.84     |              | TD    | Ref         | Ref       | Ref      |              | TD    | NA          | NA        | NA       |
|              | NC    | -0.08       | 1.44      | 0.96     |              | NC    | 1.12        | 0.88      | 0.20     |              | NC    | 0.37        | 0.41      | 0.36     |              | NC    | Ref         | Ref       | Ref      |

**Phones and internet**

|              |       |             |           |          |              |       |             |           |          |              |       |             |           |          |              |       |             |           |          |
|--------------|-------|-------------|-----------|----------|--------------|-------|-------------|-----------|----------|--------------|-------|-------------|-----------|----------|--------------|-------|-------------|-----------|----------|
| <b>From:</b> | LM-I  |             |           |          | <b>From:</b> | PMF-I |             |           |          | <b>From:</b> | TD    |             |           |          | <b>From:</b> | NC    |             |           |          |
|              |       | <i>Est.</i> | <i>SE</i> | <i>P</i> |
| <b>To:</b>   | D     | -0.27       | 0.16      | 0.10     | <b>To:</b>   | D     | -0.22       | 0.31      | 0.49     | <b>To:</b>   | D     | -0.01       | 0.27      | 0.96     | <b>To:</b>   | D     | -0.23       | 0.22      | 0.30     |
|              | LM-I  | Ref         | Ref       | Ref      |              | LM-I  | -0.31       | 0.58      | 0.60     |              | LM-I  | -0.05       | 0.36      | 0.89     |              | LM-I  | -0.50       | 0.22      | 0.02     |
|              | PMF-I | 0.09        | 0.67      | 0.90     |              | PMF-I | Ref         | Ref       | Ref      |              | PMF-I | -0.41       | 0.78      | 0.60     |              | PMF-I | 0.59        | 0.87      | 0.50     |
|              | TD    | NA          | NA        | NA       |              | TD    | 0.21        | 0.69      | 0.76     |              | TD    | Ref         | Ref       | Ref      |              | TD    | NA          | NA        | NA       |
|              | NC    | 0.10        | 0.62      | 0.88     |              | NC    | 0.19        | 0.44      | 0.67     |              | NC    | 1.66        | 0.52      | 0.00     |              | NC    | Ref         | Ref       | Ref      |

**Gardening/maintenance**

|              |       |             |           |          |              |       |             |           |          |              |       |             |           |          |              |       |             |           |          |
|--------------|-------|-------------|-----------|----------|--------------|-------|-------------|-----------|----------|--------------|-------|-------------|-----------|----------|--------------|-------|-------------|-----------|----------|
| <b>From:</b> | LM-I  |             |           |          | <b>From:</b> | PMF-I |             |           |          | <b>From:</b> | TD    |             |           |          | <b>From:</b> | NC    |             |           |          |
|              |       | <i>Est.</i> | <i>SE</i> | <i>P</i> |
| <b>To:</b>   | D     | -0.61       | 0.18      | 0.00     | <b>To:</b>   | D     | -0.18       | 0.35      | 0.60     | <b>To:</b>   | D     | -0.48       | 0.28      | 0.78     | <b>To:</b>   | D     | -0.32       | 0.18      | 0.08     |
|              | LM-I  | Ref         | Ref       | Ref      |              | LM-I  | 0.09        | 0.57      | 0.87     |              | LM-I  | 0.13        | 0.34      | 0.70     |              | LM-I  | 0.00        | 0.00      | 1.00     |
|              | PMF-I | -0.05       | 0.73      | 0.95     |              | PMF-I | Ref         | Ref       | Ref      |              | PMF-I | -1.15       | 1.11      | 0.30     |              | PMF-I | -0.21       | 0.36      | 0.55     |



|  |    |      |      |      |  |    |       |      |      |  |    |      |      |      |  |    |     |     |     |
|--|----|------|------|------|--|----|-------|------|------|--|----|------|------|------|--|----|-----|-----|-----|
|  | TD | 0.88 | 4.15 | 0.83 |  | TD | 1.65  | 1.55 | 0.29 |  | TD | Ref  | Ref  | Ref  |  | TD | NA  | NA  | NA  |
|  | NC | 0.63 | 0.58 | 0.28 |  | NC | -0.40 | 0.57 | 0.48 |  | NC | 0.79 | 0.37 | 0.03 |  | NC | Ref | Ref | Ref |

**Watching television**

|              |       |             |           |          |              |       |             |           |          |              |       |             |           |          |              |       |             |           |          |
|--------------|-------|-------------|-----------|----------|--------------|-------|-------------|-----------|----------|--------------|-------|-------------|-----------|----------|--------------|-------|-------------|-----------|----------|
| <b>From:</b> | LM-I  |             |           |          | <b>From:</b> | PMF-I |             |           |          | <b>From:</b> | TD    |             |           |          | <b>From:</b> | NC    |             |           |          |
|              |       | <b>Est.</b> | <b>SE</b> | <b>P</b> |
| <b>To:</b>   | D     | -0.39       | 0.21      | 0.06     | <b>To:</b>   | D     | -0.49       | 0.40      | 0.21     | <b>To:</b>   | D     | -0.85       | 0.35      | 0.02     | <b>To:</b>   | D     | 0.05        | 0.67      | 0.94     |
|              | LM-I  | Ref         | Ref       | Ref      |              | LM-I  | -0.77       | 0.59      | 0.19     |              | LM-I  | -0.28       | 0.53      | 0.60     |              | LM-I  | -0.21       | 0.51      | 0.57     |
|              | PMF-I | -0.21       | 0.84      | 0.81     |              | PMF-I | Ref         | Ref       | Ref      |              | PMF-I | 0.05        | 1.33      | 0.97     |              | PMF-I | -0.99       | 0.51      | 0.05     |
|              | TD    | 5.54        | 3.00      | 0.07     |              | TD    | -0.60       | 0.83      | 0.47     |              | TD    | Ref         | Ref       | Ref      |              | TD    | NA          | NA        | NA       |
|              | NC    | 0.76        | 1.21      | 0.53     |              | NC    | 2.11        | 2.90      | 0.47     |              | NC    | 0.72        | 0.66      | 0.28     |              | NC    | Ref         | Ref       | Ref      |

**Sewing or other crafts**

|              |       |             |           |          |              |       |             |           |          |              |       |             |           |          |              |       |             |           |          |
|--------------|-------|-------------|-----------|----------|--------------|-------|-------------|-----------|----------|--------------|-------|-------------|-----------|----------|--------------|-------|-------------|-----------|----------|
| <b>From:</b> | LM-I  |             |           |          | <b>From:</b> | PMF-I |             |           |          | <b>From:</b> | TD    |             |           |          | <b>From:</b> | NC    |             |           |          |
|              |       | <b>Est.</b> | <b>SE</b> | <b>P</b> |
| <b>To:</b>   | D     | -0.14       | 0.25      | 0.58     | <b>To:</b>   | D     | -0.96       | 0.39      | 0.01     | <b>To:</b>   | D     | -0.89       | 0.30      | 0.00     | <b>To:</b>   | D     | -0.42       | 0.22      | 0.06     |
|              | LM-I  | Ref         | Ref       | Ref      |              | LM-I  | -3.83       | 5.94      | 0.52     |              | LM-I  | -0.99       | 0.42      | 0.02     |              | LM-I  | -0.52       | 0.23      | 0.03     |
|              | PMF-I | 0.16        | 0.94      | 0.86     |              | PMF-I | Ref         | Ref       | Ref      |              | PMF-I | -1.00       | 1.34      | 0.46     |              | PMF-I | 0.17        | 0.36      | 0.62     |
|              | TD    | NA          | NA        | NA       |              | TD    | NA          | NA        | NA       |              | TD    | Ref         | Ref       | Ref      |              | TD    | NA          | NA        | NA       |
|              | NC    | 0.01        | 1.15      | 1.00     |              | NC    | -0.07       | 0.39      | 0.87     |              | NC    | 0.37        | 0.30      | 0.29     |              | NC    | Ref         | Ref       | Ref      |

**Engaging in at least 4 of the above activities**

|              |       |             |           |          |              |       |             |           |          |              |       |             |           |          |              |       |             |           |          |
|--------------|-------|-------------|-----------|----------|--------------|-------|-------------|-----------|----------|--------------|-------|-------------|-----------|----------|--------------|-------|-------------|-----------|----------|
| <b>From:</b> | LM-I  |             |           |          | <b>From:</b> | PMF-I |             |           |          | <b>From:</b> | TD    |             |           |          | <b>From:</b> | NC    |             |           |          |
|              |       | <b>Est.</b> | <b>SE</b> | <b>P</b> |
| <b>To:</b>   | D     | -0.47       | 0.21      | 0.03     | <b>To:</b>   | D     | -0.75       | 0.39      | 0.04     | <b>To:</b>   | D     | -0.28       | 0.27      | 0.30     | <b>To:</b>   | D     | -0.50       | 0.13      | 0.00     |
|              | LM-I  | Ref         | Ref       | Ref      |              | LM-I  | -83         | 0.85      | 0.33     |              | LM-I  | 0.05        | 0.31      | 0.87     |              | LM-I  | -0.69       | 0.16      | 0.00     |
|              | PMF-I | -0.715      | 1.00      | 0.47     |              | PMF-I | Ref         | Ref       | Ref      |              | PMF-I | -0.41       | 0.83      | 0.62     |              | PMF-I | -0.41       | 0.26      | 0.11     |
|              | TD    | NA          | NA        | NA       |              | TD    | -0.26       | 0.66      | 0.69     |              | TD    | Ref         | Ref       | Ref      |              | TD    | NA          | NA        | NA       |
|              | NC    | -0.83       | 1.72      | 0.63     |              | NC    | 0.48        | 0.37      | 0.21     |              | NC    | 1.74        | 0.26      | 0.00     |              | NC    | Ref         | Ref       | Ref      |

<sup>1</sup>D=Death; LM-I=Learning and memory impairment; PMF-I=Perceptual-motor function impairment; TD=Temporal disorientation; NC=Normal cognition
